# Supplementary material for: Adaptive Morphophysiological Features of Neottia ovata (Orchidaceae) Contributing to Its Natural Colonization on Fly Ash Deposits
Source: MDPI journal article supplement (doi:10.3390/horticulturae7050109), 2021-05-11
Supplement: s1 [file s1]

## Supplementary Materials

**Table S1.** Spearman's correlation between total metal content in the soil with metals in leaves and rhizome + roots of *N. ovata* from the natural forest community and the fly ash dump.

| Metal Content,<br>mg kg <sup>-1</sup> DW |                 | K                  | Ca       | Mg       | Fe       | Zn       | Mn       | Pb       | Cu       | Ni     | Cr       | Co       |
|------------------------------------------|-----------------|--------------------|----------|----------|----------|----------|----------|----------|----------|--------|----------|----------|
| K                                        | Leaves          | 0.343 <sup>1</sup> | -0.462   | -0.881 * | -0.469   | -0.818 * | -0.846 * | 0.783 *  | -0.881 * | -0.524 | 0.874 *  | 0.077    |
|                                          | Rhizome + roots | 0.448              | -0.559   | -0.643 * | -0.210   | -0.622 * | -0.685 * | 0.727 *  | -0.713 * | -0.224 | 0.713 *  | 0.231    |
| Ca                                       | Leaves          | 0.371              | -0.147   | 0.343    | 0.776 *  | 0.469    | 0.350    | -0.573   | 0.378    | 0.301  | -0.063   | 0.147    |
|                                          | Rhizome + roots | 0.245              | -0.070   | 0.517    | 0.720 *  | 0.615 *  | 0.448    | -0.364   | 0.608 *  | 0.685  | -0.371   | 0.490    |
| Mg                                       | Leaves          | -0.503             | 0.441    | 0.888 *  | 0.371    | 0.720 *  | 0.874 *  | -0.783 * | 0.797 *  | 0.420  | -0.888 * | -0.259   |
|                                          | Rhizome + roots | -0.224             | 0.168    | 0.727 *  | 0.371    | 0.573    | 0.622 *  | -0.483   | 0.657 *  | 0.629  | -0.804 * | 0.168    |
| Fe                                       | Leaves          | -0.930 *           | 0.881 *  | 0.476    | -0.497   | 0.175    | 0.455    | -0.266   | 0.385    | -0.336 | -0.497   | -0.755 * |
|                                          | Rhizome + roots | -0.853 *           | 0.888 *  | 0.483    | -0.483   | 0.217    | 0.420    | -0.231   | 0.385    | -0.301 | -0.483   | -0.713 * |
| Zn                                       | Leaves          | -0.420             | 0.517    | -0.420   | -0.846 * | -0.517   | -0.399   | 0.469    | -0.420   | -0.860 | 0.497    | -0.622 * |
|                                          | Rhizome + roots | 0.272              | -0.308   | 0.517    | 0.818 *  | 0.685 *  | 0.483    | -0.601 * | 0.594 *  | 0.790  | -0.524   | 0.503    |
| Mn                                       | Leaves          | -0.874 *           | 0.874 *  | 0.399    | -0.427   | 0.168    | 0.448    | -0.385   | 0.336    | -0.427 | -0.427   | -0.762 * |
|                                          | Rhizome + roots | -0.895 *           | 0.888 *  | 0.399    | -0.441   | 0.161    | 0.503    | -0.315   | 0.371    | -0.357 | -0.441   | -0.769 * |
| Pb                                       | Leaves          | 0.350              | -0.322   | -0.825 * | -0.392   | -0.699 * | -0.881 * | 0.783 *  | -0.769 * | -0.573 | 0.951 *  | 0.224    |
|                                          | Rhizome + roots | 0.636 *            | -0.762 * | -0.594 * | 0.112    | -0.469   | -0.629 * | 0.524    | -0.580 * | 0.035  | 0.615 *  | 0.615 *  |
| Cu                                       | Leaves          | 0.601 *            | -0.399   | -0.105   | 0.497    | 0.112    | -0.077   | -0.294   | -0.091   | 0.0980 | 0.245    | 0.140    |
|                                          | Rhizome + roots | -0.718 *           | 0.757 *  | 0.764 *  | -0.042   | 0.448    | 0.750 *  | -0.532   | 0.592 *  | -0.007 | -0.673 * | -0.680 * |
| Ni                                       | Leaves          | 0.683 *            | -0.557   | 0.207    | 0.718 *  | 0.301    | 0.130    | -0.182   | 0.175    | 0.697  | -0.123   | 0.536    |
|                                          | Rhizome + roots | -0.455             | 0.503    | -0.406   | -0.797 * | -0.503   | -0.406   | 0.399    | -0.399   | -0.867 | 0.462    | -0.497   |
| Cr                                       | Leaves          | 0.091              | -0.112   | -0.666 * | -0.483   | -0.676 * | -0.739 * | 0.725 *  | -0.683 * | -0.697 | 0.862 *  | -0.035   |
|                                          | Rhizome + roots | 0.189              | -0.028   | -0.545   | -0.503   | -0.357   | -0.727 * | 0.671 *  | -0.483   | -0.392 | 0.671 *  | 0.147    |
| Co                                       | Leaves          | 0.560              | -0.592 * | -0.200   | 0.441    | 0.053    | -0.186   | 0.056    | -0.049   | 0.382  | 0.231    | 0.609 *  |
|                                          | Rhizome + roots | 0.685 *            | -0.692 * | -0.245   | 0.552    | -0.084   | -0.168   | -0.098   | -0.189   | 0.329  | 0.217    | 0.615 *  |

<sup>1</sup> Data are Spearman's rank correlation coefficients (r); Asterisks (\*) mean significant values at  $p < 0.05$  (n = 10).

**Table S2.** Spearman's correlation between available metal content in the soil with metals in leaves and rhizome + roots of *N. ovata* from the natural forest community and the fly ash dump.

| Metal Content,<br>mg kg <sup>-1</sup> DW |                 | K                   | Ca       | Mg       | Fe       | Zn       | Mn       | Pb       | Cu       | Ni       | Cr     | Co       |
|------------------------------------------|-----------------|---------------------|----------|----------|----------|----------|----------|----------|----------|----------|--------|----------|
| K                                        | Leaves          | 0.783 <sup>1*</sup> | -0.825 * | -0.909 * | -0.930 * | -0.462   | -0.937 * | 0.783 *  | -0.895 * | -0.853 * | 0.846  | 0.294    |
|                                          | Rhizome + roots | 0.664 *             | -0.762 * | -0.790 * | -0.832 * | -0.622 * | -0.790 * | 0.755 *  | -0.755 * | -0.741 * | 0.776  | 0.378    |
| Ca                                       | Leaves          | 0.014               | 0.510    | 0.280    | 0.336    | -0.112   | 0.371    | -0.049   | 0.455    | 0.510    | 0.021  | 0.580 *  |
|                                          | Rhizome + roots | -0.140              | 0.364    | 0.636 *  | 0.524    | -0.112   | 0.629 *  | -0.161   | 0.524    | 0.559    | -0.287 | 0.168    |
| Mg                                       | Leaves          | -0.797 *            | 0.769 *  | 0.692 *  | 0.832 *  | 0.448    | 0.853 *  | -0.692 * | 0.846 *  | 0.741 *  | -0.748 | -0.217   |
|                                          | Rhizome + roots | -0.615 *            | 0.510    | 0.671 *  | 0.699 *  | 0.154    | 0.706 *  | -0.524   | 0.622 *  | 0.490    | -0.643 | -0.434   |
| Fe                                       | Leaves          | -0.601 *            | 0.238    | 0.224    | 0.399    | 0.839 *  | 0.420    | -0.378   | 0.406    | 0.364    | -0.601 | -0.685 * |
|                                          | Rhizome + roots | -0.601 *            | 0.252    | 0.273    | 0.434    | 0.867    | 0.413    | -0.399   | 0.427    | 0.392    | -0.580 | -0.720 * |
| Zn                                       | Leaves          | 0.266               | -0.490   | -0.538   | -0.434   | 0.503    | -0.420   | 0.420    | -0.378   | -0.294   | 0.301  | -0.301   |
|                                          | Rhizome + roots | -0.238              | 0.622 *  | 0.671 *  | 0.573    | -0.266   | 0.580 *  | -0.385   | 0.538    | 0.427    | -0.301 | 0.406    |
| Mn                                       | Leaves          | -0.615 *            | 0.371    | 0.245    | 0.427    | 0.881 *  | 0.441    | -0.441   | 0.427    | 0.455    | -0.622 | -0.615 * |
|                                          | Rhizome + roots | -0.531              | 0.266    | 0.231    | 0.448    | 0.909 *  | 0.469    | -0.399   | 0.455    | 0.476    | -0.524 | -0.594 * |
| Pb                                       | Leaves          | 0.839 *             | -0.797 * | -0.727 * | -0.825 * | -0.336   | -0.776 * | 0.902 *  | -0.818 * | -0.650 * | 0.727  | 0.210    |
|                                          | Rhizome + roots | 0.762 *             | -0.559   | -0.538   | -0.566   | -0.692 * | -0.566   | 0.748 *  | -0.594 * | -0.580 * | 0.762  | 0.371    |
| Cu                                       | Leaves          | 0.098               | 0.329    | -0.063   | -0.140   | -0.406   | -0.147   | -0.014   | -0.014   | -0.021   | 0.245  | 0.706 *  |
|                                          | Rhizome + roots | -0.851 *            | 0.504    | 0.368    | 0.525    | 0.627 *  | 0.627 *  | -0.560   | 0.644 *  | 0.609 *  | -0.725 | -0.399   |
| Ni                                       | Leaves          | 0.011               | 0.210    | 0.186    | 0.091    | -0.606 * | 0.095    | -0.060   | 0.151    | 0.049    | 0.130  | 0.424    |
|                                          | Rhizome + roots | 0.259               | -0.420   | -0.455   | -0.336   | 0.538    | -0.322   | 0.441    | -0.343   | -0.224   | 0.203  | -0.434   |
| Cr                                       | Leaves          | 0.739 *             | -0.795 * | -0.781 * | -0.764 * | -0.144   | -0.697 * | 0.914 *  | -0.711 * | -0.543   | 0.655  | 0.112    |
|                                          | Rhizome + roots | 0.601 *             | -0.538   | -0.420   | -0.538   | -0.014   | -0.497   | 0.790 *  | -0.524   | -0.559   | 0.671  | 0.105    |
| Co                                       | Leaves          | 0.333               | -0.067   | -0.007   | -0.294   | -0.718 * | -0.098   | 0.305    | -0.228   | -0.280   | 0.273  | 0.736 *  |
|                                          | Rhizome + roots | 0.308               | 0.070    | -0.084   | -0.133   | -0.629 * | -0.105   | 0.203    | -0.147   | -0.140   | 0.315  | 0.406    |

<sup>1</sup>Data are Spearman's rank correlation coefficients (r); Asterisks (\*) mean significant values at  $p < 0.05$  (n = 10).

**Table S3.** Spearman's correlation between total and available metal content in the soil with physiological parameters of *N. ovata* from the natural forest community and the fly ash dump.

| Metal Content,<br>mg kg <sup>-1</sup> DW |           | Chl a,<br>mg g <sup>-1</sup> DW | Chl b,<br>mg g <sup>-1</sup> DW | Chl (a+b),<br>mg g <sup>-1</sup> DW | CAR,<br>mg g <sup>-1</sup> DW | CO <sub>2</sub> uptake,<br>mg CO <sub>2</sub> mg <sup>-1</sup><br>chlorophyll h <sup>-1</sup> | CO <sub>2</sub> uptake,<br>mg CO <sub>2</sub> 10 <sup>-8</sup><br>chloroplast h <sup>-1</sup> | CO <sub>2</sub> uptake,<br>mg CO <sub>2</sub> dm <sup>-2</sup> h <sup>-1</sup> | Transpiration,<br>g H <sub>2</sub> O dm <sup>-2</sup> h <sup>-1</sup> |
|------------------------------------------|-----------|---------------------------------|---------------------------------|-------------------------------------|-------------------------------|-----------------------------------------------------------------------------------------------|-----------------------------------------------------------------------------------------------|--------------------------------------------------------------------------------|-----------------------------------------------------------------------|
| K                                        | Total     | -0.354 <sup>1</sup>             | 0.553 *                         | -0.029                              | 0.855 *                       | -0.147                                                                                        | -0.693 *                                                                                      | -0.693 *                                                                       | -0.759 *                                                              |
|                                          | Available | -0.863 *                        | -0.199                          | -0.722 *                            | 0.494 *                       | 0.059                                                                                         | -0.236                                                                                        | -0.236                                                                         | -0.590 *                                                              |
| Ca                                       | Total     | 0.354                           | -0.553 *                        | 0.029                               | -0.855 *                      | 0.147                                                                                         | 0.693 *                                                                                       | 0.693 *                                                                        | 0.759 *                                                               |
|                                          | Available | 0.863 *                         | 0.199                           | 0.722 *                             | -0.494 *                      | -0.059                                                                                        | 0.236                                                                                         | 0.236                                                                          | 0.590 *                                                               |
| Mg                                       | Total     | 0.863 *                         | 0.199                           | 0.722 *                             | -0.494 *                      | -0.059                                                                                        | 0.236                                                                                         | 0.236                                                                          | 0.590 *                                                               |
|                                          | Available | 0.863 *                         | 0.199                           | 0.722 *                             | -0.494 *                      | -0.059                                                                                        | 0.236                                                                                         | 0.236                                                                          | 0.590 *                                                               |
| Fe                                       | Total     | 0.509 *                         | 0.752 *                         | 0.693 *                             | 0.361                         | -0.206                                                                                        | -0.457 *                                                                                      | -0.457 *                                                                       | -0.170                                                                |
|                                          | Available | 0.863 *                         | 0.199                           | 0.722 *                             | -0.494 *                      | -0.059                                                                                        | 0.236                                                                                         | 0.236                                                                          | 0.590 *                                                               |
| Zn                                       | Total     | 0.863 *                         | 0.199                           | 0.722 *                             | -0.494 *                      | -0.059                                                                                        | 0.236                                                                                         | 0.236                                                                          | 0.590 *                                                               |
|                                          | Available | 0.354                           | -0.553 *                        | 0.029                               | -0.855 *                      | 0.147                                                                                         | 0.693 *                                                                                       | 0.693 *                                                                        | 0.759 *                                                               |
| Mn                                       | Total     | 0.863 *                         | 0.199                           | 0.722 *                             | -0.494 *                      | -0.059                                                                                        | 0.236                                                                                         | 0.236                                                                          | 0.590 *                                                               |
|                                          | Available | 0.863 *                         | 0.199                           | 0.722 *                             | -0.494 *                      | -0.059                                                                                        | 0.236                                                                                         | 0.236                                                                          | 0.590 *                                                               |
| Pb                                       | Total     | -0.863 *                        | -0.199                          | -0.722 *                            | 0.494 *                       | 0.059                                                                                         | -0.236                                                                                        | -0.236                                                                         | -0.590 *                                                              |
|                                          | Available | -0.863 *                        | -0.199                          | -0.722 *                            | 0.494 *                       | 0.059                                                                                         | -0.236                                                                                        | -0.236                                                                         | -0.590 *                                                              |
| Cu                                       | Total     | 0.863 *                         | 0.199                           | 0.722 *                             | -0.494 *                      | -0.059                                                                                        | 0.236                                                                                         | 0.236                                                                          | 0.590 *                                                               |
|                                          | Available | 0.874 *                         | 0.225                           | 0.737 *                             | -0.483                        | -0.048                                                                                        | 0.239                                                                                         | 0.239                                                                          | 0.593 *                                                               |
| Ni                                       | Total     | 0.509 *                         | 0.752 *                         | 0.693 *                             | 0.361                         | -0.206                                                                                        | -0.457 *                                                                                      | -0.457 *                                                                       | -0.170                                                                |
|                                          | Available | 0.863 *                         | 0.199                           | 0.722 *                             | -0.494 *                      | -0.059                                                                                        | 0.236                                                                                         | 0.236                                                                          | 0.590 *                                                               |
| Cr                                       | Total     | -0.863 *                        | -0.199                          | -0.722 *                            | 0.494 *                       | -0.059                                                                                        | -0.236                                                                                        | -0.236                                                                         | -0.714 *                                                              |
|                                          | Available | -0.863 *                        | -0.199                          | -0.722 *                            | 0.494 *                       | -0.059                                                                                        | -0.236                                                                                        | -0.236 *                                                                       | -0.714 *                                                              |
| Co                                       | Total     | 0.509 *                         | 0.752 *                         | 0.693 *                             | 0.361                         | -0.206                                                                                        | -0.457 *                                                                                      | -0.457 *                                                                       | -0.170                                                                |
|                                          | Available | 0.509 *                         | 0.752 *                         | 0.693 *                             | 0.361                         | -0.206                                                                                        | -0.457 *                                                                                      | -0.457 *                                                                       | -0.170                                                                |

<sup>1</sup>Data are Spearman's rank correlation coefficients (r); Asterisks (\*) mean significant values at  $p < 0.05$  (n = 24).

**Table S4.** Spearman's correlation between metal content in the leaves and rhizome + roots with physiological parameters of *N. ovata* from the natural forest community and the fly ash dump.

| Metal Content,<br>mg kg <sup>-1</sup> DW |                 | Chl a,<br>mg g <sup>-1</sup> DW | Chl b,<br>mg g <sup>-1</sup> DW | Chl (a+b),<br>mg g <sup>-1</sup> DW | CAR,<br>mg g <sup>-1</sup> DW | CO <sub>2</sub> uptake,<br>mg CO <sub>2</sub> mg <sup>-1</sup><br>chlorophyll h <sup>-1</sup> | CO <sub>2</sub> uptake,<br>mg CO <sub>2</sub> 10 <sup>-8</sup><br>chloroplast h <sup>-1</sup> | CO <sub>2</sub> uptake,<br>mg CO <sub>2</sub> dm <sup>-2</sup> h <sup>-1</sup> | Transpiration,<br>g H <sub>2</sub> O dm <sup>-2</sup> h <sup>-1</sup> |
|------------------------------------------|-----------------|---------------------------------|---------------------------------|-------------------------------------|-------------------------------|-----------------------------------------------------------------------------------------------|-----------------------------------------------------------------------------------------------|--------------------------------------------------------------------------------|-----------------------------------------------------------------------|
| K                                        | Leaves          | -0.863 <sup>1*</sup>            | -0.199                          | -0.722 *                            | 0.494 *                       | 0.059                                                                                         | -0.236                                                                                        | -0.236                                                                         | -0.590 *                                                              |
|                                          | Rhizome + roots | -0.863 *                        | -0.199                          | -0.722 *                            | 0.494 *                       | 0.059                                                                                         | -0.236                                                                                        | -0.236                                                                         | -0.590 *                                                              |
| Ca                                       | Leaves          | 0.509 *                         | 0.752 *                         | 0.693 *                             | 0.361                         | -0.206                                                                                        | -0.457 *                                                                                      | -0.457 *                                                                       | -0.170                                                                |
|                                          | Rhizome + roots | 0.509 *                         | 0.752 *                         | 0.693 *                             | 0.361                         | -0.206                                                                                        | -0.457 *                                                                                      | -0.457 *                                                                       | -0.170                                                                |
| Mg                                       | Leaves          | 0.863 *                         | 0.199                           | 0.722 *                             | -0.494 *                      | -0.059                                                                                        | 0.236                                                                                         | 0.236                                                                          | 0.590 *                                                               |
|                                          | Rhizome + roots | 0.863 *                         | 0.199                           | 0.722 *                             | -0.494 *                      | -0.059                                                                                        | 0.236                                                                                         | 0.236                                                                          | 0.590 *                                                               |
| Fe                                       | Leaves          | 0.354                           | -0.553 *                        | 0.029                               | -0.855 *                      | 0.147                                                                                         | 0.693 *                                                                                       | 0.693 *                                                                        | 0.759 *                                                               |
|                                          | Rhizome + roots | 0.354                           | -0.553 *                        | 0.029                               | -0.855 *                      | 0.147                                                                                         | 0.693 *                                                                                       | 0.693 *                                                                        | 0.759 *                                                               |
| Zn                                       | Leaves          | -0.509 *                        | -0.752 *                        | -0.693 *                            | -0.361                        | 0.206                                                                                         | 0.457 *                                                                                       | 0.457 *                                                                        | 0.170                                                                 |
|                                          | Rhizome + roots | 0.509 *                         | 0.752 *                         | 0.693 *                             | 0.361                         | -0.206                                                                                        | -0.457 *                                                                                      | -0.457 *                                                                       | -0.170                                                                |
| Mn                                       | Leaves          | 0.354                           | -0.553 *                        | 0.029                               | -0.855 *                      | 0.147                                                                                         | 0.693 *                                                                                       | 0.693 *                                                                        | 0.759 *                                                               |
|                                          | Rhizome + roots | 0.354                           | -0.553 *                        | 0.029                               | -0.855 *                      | 0.147                                                                                         | 0.693 *                                                                                       | 0.693 *                                                                        | 0.759 *                                                               |
| Pb                                       | Leaves          | -0.863 *                        | -0.199                          | -0.722 *                            | 0.494 *                       | 0.059                                                                                         | -0.236                                                                                        | -0.236                                                                         | -0.590 *                                                              |
|                                          | Rhizome + roots | -0.354                          | 0.553 *                         | -0.029                              | 0.855 *                       | -0.147                                                                                        | -0.693 *                                                                                      | -0.693 *                                                                       | -0.759 *                                                              |
| Cu                                       | Leaves          | -0.354                          | 0.553 *                         | -0.029                              | 0.855 *                       | -0.147                                                                                        | -0.693 *                                                                                      | -0.693 *                                                                       | -0.759 *                                                              |
|                                          | Rhizome + roots | 0.354                           | -0.553 *                        | 0.029                               | -0.855 *                      | 0.147                                                                                         | 0.693 *                                                                                       | 0.693 *                                                                        | 0.759 *                                                               |
| Ni                                       | Leaves          | 0.509 *                         | 0.752 *                         | 0.693 *                             | 0.361                         | -0.206                                                                                        | -0.457 *                                                                                      | -0.457 *                                                                       | -0.170                                                                |
|                                          | Rhizome + roots | -0.509 *                        | -0.752 *                        | -0.693 *                            | -0.361                        | 0.206                                                                                         | 0.457 *                                                                                       | 0.457 *                                                                        | 0.170                                                                 |
| Cr                                       | Leaves          | -0.863 *                        | -0.199                          | -0.722 *                            | 0.494 *                       | 0.059                                                                                         | -0.236                                                                                        | -0.236                                                                         | -0.590 *                                                              |
|                                          | Rhizome + roots | -0.863 *                        | -0.199                          | -0.722 *                            | 0.494 *                       | 0.059                                                                                         | -0.236                                                                                        | -0.236                                                                         | -0.590 *                                                              |
| Co                                       | Leaves          | -0.354                          | 0.553 *                         | -0.029                              | 0.855 *                       | -0.147                                                                                        | -0.693 *                                                                                      | -0.693 *                                                                       | -0.759 *                                                              |
|                                          | Rhizome + roots | -0.354                          | 0.553 *                         | -0.029                              | 0.855 *                       | -0.147                                                                                        | -0.693 *                                                                                      | -0.693 *                                                                       | -0.759 *                                                              |

<sup>1</sup>Data are Spearman's rank correlation coefficients (r); Asterisks (\*) mean significant values at  $p < 0.05$  (n = 24).

**Table S5.** The mesostructure parameters of the lower leaf of *N. ovata* from the natural forest community (P-1) and the fly ash dump (P-2).

| Parameters                                                       | Populations                                                    |                                      |
|------------------------------------------------------------------|----------------------------------------------------------------|--------------------------------------|
|                                                                  | P-1                                                            | P-2                                  |
| Leaf thickness, $\mu\text{m}$                                    | $510.18 \pm 6.15$ <sup>1</sup><br>(432.00–600.48) <sup>2</sup> | $504.91 \pm 6.85$<br>(399.60–712.80) |
| Number of chloroplasts per unit area (million $\text{cm}^{-2}$ ) | $2.48 \pm 0.05$<br>(1.78–3.58)                                 | $2.80 \pm 0.05$ *<br>(1.35–4.03)     |
| Mesophyll cell surface area, thousand $\mu\text{m}^2$            | $15.34 \pm 0.38$<br>(6.02–23.11)                               | $14.81 \pm 0.24$<br>(9.71–23.80)     |
| Mesophyll cell volume, thousand $\mu\text{m}^3$                  | $101.26 \pm 3.69$<br>(24.57–219.30)                            | $99.88 \pm 2.37$<br>(50.27–206.22)   |
| Chloroplast surface area, $\mu\text{m}^2$                        | $87.32 \pm 1.88$<br>(57.87–129.83)                             | $90.47 \pm 1.60$<br>(53.10–146.39)   |
| Chloroplast volume, $\mu\text{m}^3$                              | $77.82 \pm 2.55$<br>(41.41–139.15)                             | $82.46 \pm 2.18$<br>(36.37–140.14)   |

<sup>1</sup> Data is presented as mean  $\pm$  SE (n = 30); <sup>2</sup> In the brackets are the minimum and maximum values. Asterisk (\*) indicates significant differences between the studied populations according to Mann–Whitney *U*-test ( $p < 0.05$ ).
