# Supplementary material for: Adaptive Morphophysiological Features of Neottia ovata (Orchidaceae) Contributing to Its Natural Colonization on Fly Ash Deposits
Source: MDPI journal article supplement (doi:10.3390/horticulturae7050109), 2021-05-11
Supplement: s1 [file s1]

Archive with 1 entries (1 files):
- horticulturae-1193816-supplementary.pdf
